# Supplementary material for: Ishophloroglucin A Ameliorates VEGF-Induced Epithelial-Mesenchymal Transition via VEGFR2 Pathway Inhibition in Microgravity-Stimulated Human Retinal Pigment Epithelial Cells
Source: MDPI journal article supplement (doi:10.3390/antiox11112212), 2022-11-08
Supplement: s1 [file s1]

## Supplementary Materials

**Table S1.** Primer list for quantitative real-time PCR.

| Gene         |         | Primers                              |
|--------------|---------|--------------------------------------|
| <i>ACTA2</i> | Forward | 5'-AAA AGA CAG CTA CGT GGG TGA-3'    |
|              | Reverse | 5'-GCC ATG TTC TAT CGG GTA CTT C-3'  |
| <i>CDC42</i> | Forward | 5'-CCA TCG GAA TAT GTA CCG ACT G-3'  |
|              | Reverse | 5'-CTC AGC GGT CGT AAT CTG TCA-3'    |
| <i>CDH2</i>  | Forward | 5'-CCT CCA GAG TTT ACT GCC ATG AC-3' |
|              | Reverse | 5'-GTA GGA TCT CCG CCA CTG ATT C-3'  |
| <i>COLA1</i> | Forward | 5'-GTG CGA TGA CGT GAT CTG TGA-3'    |
|              | Reverse | 5'-CGG TGG TTT CTT GGT CGG T-3'      |
| <i>FN1</i>   | Forward | 5'-ACA ACA CCG AGG TGA CTG AGA C-3'  |
|              | Reverse | 5'-GGA CAC AAC GAT GCT TCC TGA G-3'  |
| <i>MMP2</i>  | Forward | 5'-CCC ACT GCG GTT TTC TCG AAT-3'    |
|              | Reverse | 5'-CAA AGG GGT ATC CAT CGC CAT-3'    |
| <i>RAC1</i>  | Forward | 5'-AAC CTG CCT GCT CAT CAG TT-3'     |
|              | Reverse | 5'-TGA CAG CAC CGA TCT CTT T-3'      |
| <i>RHOA</i>  | Forward | 5'-GGA AAG CAG GTA GAG TTG GCT-3'    |
|              | Reverse | 5'-GGC TGT CGA TGG AAA AAC ACA T-3'  |
| <i>SNAI2</i> | Forward | 5'-CGA ACT GGA CAC ACA TAC AGT G-3'  |
|              | Reverse | 5'-CTG AGG ATC TCT GGT TGT GGT-3'    |
| <i>VIM</i>   | Forward | 5'-AGT CCA CTG AGT ACC GGA GAC-3'    |
|              | Reverse | 5'-CAT TTC ACG CAT CTG GCG TTC-3'    |
| <i>GAPDH</i> | Forward | 5'-ACA AAG CTG TTC AGT GTC TCC A-3'  |
|              | Reverse | 5'-CTC CGT TTC CAG AAT ACA CAC A-3'  |

**Table S2.** Antibody information for ELISA and Western blot.

| Name          | Company                  | Cat. number | Dilution rate |              |
|---------------|--------------------------|-------------|---------------|--------------|
|               |                          |             | ELISA         | Western blot |
| VEGF          | Santa Cruz Biotechnology | sc-57496    | 1:200         | -            |
| TGF $\beta$ 2 | Santa Cruz Biotechnology | sc-374658   | 1:100         | -            |
| CTGF          | Santa Cruz Biotechnology | sc-373936   | 1:100         | -            |
| VEGFR2        | Bioss                    | bs-10412R   | -             | 1:500        |
| pErk1/2       | Bioss                    | bsm-54491R  | -             | 1:500        |
| Erk1/2        | Bioss                    | bsm-52259R  | -             | 1:500        |
| pAKT1/2/3     | Santa Cruz Biotechnology | sc-271966   | -             | 1:500        |
| AKT1/2/3      | Santa Cruz Biotechnology | sc-81434    | -             | 1:500        |
| $\alpha$ -SMA | Santa Cruz Biotechnology | sc-53142    |               | 1:500        |
| Vimentin      | Santa Cruz Biotechnology | sc-6260     |               | 1:500        |
| GAPDH         | Sigma-Aldrich            | G8795       | -             | 1:1,000      |

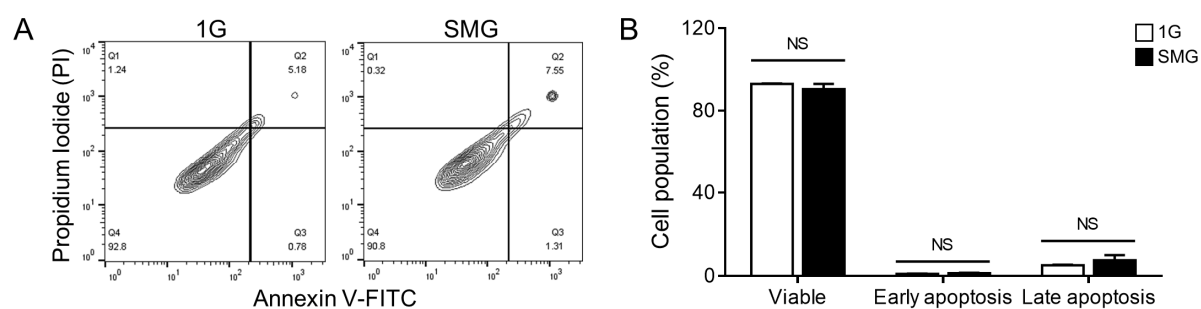

**Figure S1. Cell viability under simulated microgravity on day 7.** (A) Representative flow cytometry results using PI/Annexin V-FITC for apoptosis. ARPE19 cells were stimulated microgravity (SMG) for 7 days and the cells were stained with PI/Annexin V-FITC for flow cytometric analysis. (B) The cell population (%) of viable cells (Q4), early apoptotic cells (Q3) and late apoptotic cells (Q2) were statistically compared to 1G. FITC, fluorescein isothiocyanate; NS, Not Significant; PI, propidium iodide.

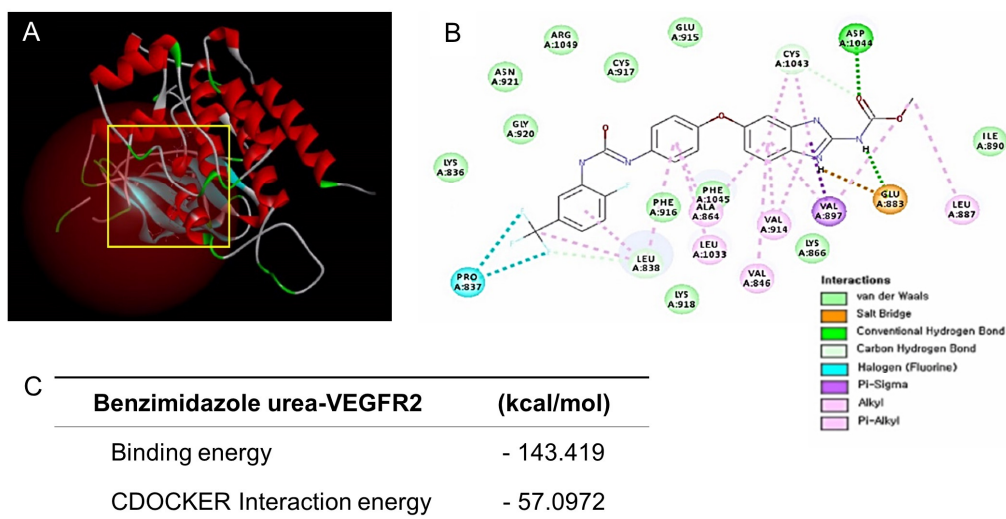

**Figure S2. Computational docking prediction of the Benzimidazole urea-VEGFR2.** (A) 3D diagram and (B) 2D diagram of Benzimidazole urea-VEGFR2 (marked in a yellow square) show the docking site. (C) The table indicates the results of the binding energy and CDOCKER interaction energy of the docking of Benzimidazole urea-VEGFR2. VEGFR2; Vascular endothelial growth factor receptor 2.

## **Supplementary Methods**

### **Flow cytometry using PI/Annexin V-FITC staining for apoptosis analysis**

ARPE19 cell apoptosis after microgravity stimulation was evaluated using an apoptosis detection kit (TransDetect®, Beijing, China) according to the manufacturer's methods. Microgravity stimulated (SMG) or normal gravity exposed (1G) ARPE19 cells were stained with 5  $\mu$ L Annexin V-FITC and 5  $\mu$ L PI at room temperature for 15 min in the dark. Stained ARPE19 cells were detected by flow cytometer (FACSCalibur; Beckman Coulter, IN, USA). A minimum of 10,000 cells were used for each analysis and the experiment was performed in triplicate.
